# Supplementary material for: Tracing DNA paths and RNA profiles in cultured cells and tissues with ORCA
Source: Springer Nature journal article supplement (doi:10.1038/s41596-020-00478-x), 2021-02-22
Supplement: MOESM3 [file 41596_2020_478_MOESM3_ESM34.xlsx]

## Sheet: Sheet1
Total cost per probeset	14.5215
Name	Vendor	Product number	amount per reaction (rxn)	unit	# units per lot	cost per lot	cost per rxn	step used
HiScribe™ T7 Quick High Yield RNA Synthesis Kit	NEB	E2050S	1	rxn (30 uL scale)	50	259	5.18	IVT
RNasin® Plus RNase Inhibitor	Fisher sci	PRN2615	2	uL	250	333	2.664	IVT + RT
Phusion® High-Fidelity PCR Master Mix with HF Buffer	NEB	M0531L	1	rxn (50 uL scale)	500	700	1.4	PCR
DNA Clean & Concentrator™-25 - Uncapped Columns	Zymo Research	D4006	1	columns + buffers	200	261	1.305	RT cleanup
Oligo Binding Buffer, 40 mL	Zymo Research	D4060-1-40	0.6	mL	40	65	0.975	RT cleanup
DNA Clean & Concentrator™-5 - Uncapped Columns	Zymo Research	D4004	1	columns + buffers	200	261	1.305	PCR cleanup
Maxima H Minus Reverse Transcriptase (200 U/µL)	Thermo	EP0753	50	U	40000	600	0.75	RT
dNTPs	Fisher	N8080260	6	uL	1000	65.75	0.3945	RT
RT primer, 200 uM	IDT	NA	10	uL	1000	20	0.2	RT
PCR rev primers, 10 uM	IDT	NA	2.5	uL	100	6	0.15	PCR
EvaGreen Dye, 20X in water	Fisher	NC0521178	2	uL	1000	60	0.12	PCR
PCR fwd primers, 10 uM	IDT	NA	2.5	uL	100	3	0.075	PCR
0.5 M EDTA, pH 8.0	FisherSci	AM9262	25	uL	1000000	114	0.00285	RT cleanup
NaOH	Fisher	BP-359-500	0.001	g	500	56.17	0.00011234	RT cleanup
