# Supplementary material for: Tracing DNA paths and RNA profiles in cultured cells and tissues with ORCA
Source: Springer Nature journal article supplement (doi:10.1038/s41596-020-00478-x), 2021-02-22
Supplement: MOESM4 [file 41596_2020_478_MOESM4_ESM35.xlsx]

## Sheet: Sheet1
Options
Number of barcodes	cy3	cy5	Alexa750	bulk-cy5	bulk-Alexa750
60	0	0	0	1	1
Results
Number of hyb. rounds	Total cost	per read	per hyb
30	25.5618	0.42603	0.562877
Reagent	amount measured	Unit used	amount made	unit	used per hybe	Cost per unit sale	Amount per unit sale	Unit sold	unit notes	cost per hyb
Glucose Oxidase	20	mg	40	mL	0.5	395	2500	mg	250 KU, mg approximated	0.0395
Catalase	200	uL	40	mL	0.5	71.19	250000	uL	50 mg in a 250 mL solution	0.0007119
cy3 imaging oligo	0.7	uL	1	well	0	160.2	100	uL	for 100 uM in Tris at 250 nmol scale	0
cy5 imaging oligo	0.7	uL	1	well	0	160.2	100	uL	for 100 uM in Tris at 250 nmol scale	0
A750 imaging oligo	0.7	uL	1	well	0	342	100	uL	for 100 uM in Tris at 250 nmol scale	0
cy5 imaging oligo (buk price)	0.7	uL	1	well	1	3295	26000	uL	26x 500 uL of 200 uM	0.0887115
A750 imaging oligo (buk price)	0.7	uL	1	well	1	9000	26000	uL	26x 500 uL of 200 uM	0.242308
strand-displacement oligos	0.9	uL	96	well	1	260	50	uL	200 uM, 25 nmol desalted in Tris	0.04875
readout-probe	0.3	uL	96	well	1	432	50	uL	200 uM 25 nmol desalted in Tris	0.027
formamide	75	mL	250	mL	2	71.19	500	mL	100% formamide	0.085428
ethlyene carbonate	25	mL	100	mL	0.6	23.56	500	mL	500 g ~ 500 mL	0.007068
SSC	50	mL	250	mL	2.6	45	1000	mL	20x SSC	0.0234
Additional costs	8.67546
Reagent	amount measured	Unit used	amount made	unit	used per exp	Cost per unit sale	Amount per unit sale	Unit sold	unit notes	cost per hyb
fiducial-488	0.7	uL	1	exp	2	295.39	100	uL	for 100 uM in Tris at 250 nmol scale	4.13546
96-well plate	1	each	1	exp	1	177	50	crate	Thermo AB-0765	3.54
coverglass	1	each	1	exp	1	500	500	box		1
