# Supplementary material for: Tracing DNA paths and RNA profiles in cultured cells and tissues with ORCA
Source: Springer Nature journal article supplement (doi:10.1038/s41596-020-00478-x), 2021-02-22
Supplement: MOESM5 [file 41596_2020_478_MOESM5_ESM36.xlsx]

## Sheet: Sheet1
Imaging time
Parameter	Value	Units
Number of FOVs:	30	number
Number of readouts:	60	number
Number of control repeats:	5	number
Number of readouts per hybridization (hyb):	2	number
Fluidics time per hybridization (min):	20	min
Imaging rate per frame (s):	0.1	seconds
Number of z-sections	100	number
Average stage movement per FOV (s):	2	seconds
Time per FOV image (min):	3.03333	min
Time per hyb + image round (min):	111	min
Time per Experiment (hours):	60.125	hrs
Analysis time
Parameter	Value	Units
Number of FOVs:	30	number
Number of readouts:	60	number
Number of control repeats:	5	number
Number of readouts per hybridization:	2	number
Number ROI per FOV	400	number
Per FOV, load data, save max-projections	20	min
Per FOV, per hyb, align images	2	s
Per spot, all hybs, crop data,	0.06	s
Per spot, all hybs, fit data (10 cores)	0.042	s
Time per FOV (min)	25.8	min
Total time (hours)	12.9	hrs
Total number of chromosomes paths:	12000
Total number of genome position images	720000
