# Supplementary material for: Tracing DNA paths and RNA profiles in cultured cells and tissues with ORCA
Source: Springer Nature journal article supplement (doi:10.1038/s41596-020-00478-x), 2021-02-22
Supplement: MOESM6 [file 41596_2020_478_MOESM6_ESM37.xlsx]

## Sheet: Sheet1
Parameter	Value	Units
FOV size	2048	linear pixels. assume square
z-frames	100	number
barcodes per image	1	number
Number of readouts	100	number
Number of FOVs	100	number
Size per daxfile	1.67772	Gb
Size per experiment	16.7772	Tb
$/Tb/4-yr	50	dollars/4-yr
Estimated cost	838.861	dollars
