# Supplementary material for: Tracing DNA paths and RNA profiles in cultured cells and tissues with ORCA
Source: Springer Nature journal article supplement (doi:10.1038/s41596-020-00478-x), 2021-02-22
Supplement: MOESM7 [file 41596_2020_478_MOESM7_ESM38.xlsx]

## Sheet: ScopeCosts
			Total Cost =	208631
PARTS SUMMARY
					Lasers
Component	Supplier/Vendor	Price		Quotes	Detailed description			Date Requested	Date Recieved	Notes
Table	Newport, Stanford	14163.8			Optics table and setup
Lasers	Coherent, MPB	82797			1W+ lasers for STORM (488, 560, 647, 750) and 405 for activation
Camera	Hamamatsu	19475			CMOS camera and calibration
Microscope Body	Nikon	20737.2			Microscope body, Objectives
Microscope Stage	Ludl	30852.2			Microscope stage, XY and Piezo Z
Laser Optics	Thorlabs, Semrock, Chroma, Edmund	10534.5			Optics to combine beams
AOTF	Gooch and Housego	5911.46			AOTF to adjust laser power
Focus Lock	Thorlabs	7063.08			Focus lock to keep system in registration
Timing Control	National Instruments	3106.2			National Instruments card and components to synchronize AOTF, camera, and shutters
Computer	Dell	5105.35			Dell Precision Tower (5810), with SSD, RAM and CPU for high speed imaging
Misc Parts	Thorlabs, Amazon	64.94			Other parts (power meters, tools, safety, cables, etc).
Fluidics System	Hamilton, Gilson, Bioptechs	8128.77			Peristaltic pump, valve controllers, tubing, connectors and cables for automated fluid handling
Enclosure	McMaster	691.27			Laser-proof and light proof enclosure to protect system in operation and protect users.
ITEMIZED PARTS
Supplier/Vendor*	Catalog#/Supplier item*	Qty.*	Unit of Measure*	Unit Price*	Item Description*	Total Cost	Quote Requested	Date Requested	Date Recieved	Notes / URL
Computer	5105.35
Dell	T5810	1	each	3532.88	see configuration in quote	3532.88	2017-06-05
Amazon		1	each	1572.47	SAMSUNG 850 EVO 2.5" 4 TB SATA III 3-D Vertical Internal Solid State Drive (SSD) MZ-75E4T0B/AM	1572.47	2017-06-26			https://www.amazon.com/gp/product/B01G844OOO/ref=oh_aui_detailpage_o01_s00?ie=UTF8&psc=1
Table	14163.8			(10% discount)
Newport	RS4000-36-12	1	each	5031	RS4000 Series Optical Table, 3 ft x 6 ft x 12 in	5031	2017-04-14
Newport	S-2000A-423.5	1	set of 4	3340.8	Set of four S-2000 23.5 in tall standard isolators (legs)	3340.8	2017-04-14
Newport	ERS2010-323.5	3	each	550.8	Earthquake Restraints, 23.5 in. tall, mounting hardware to be ordered seperately	1652.4	2017-04-14
Newport	ERS2010-3-KT	1	each	174.6	Mounting Kit for Earthquake restraints	174.6	2017-04-14
Newport	Shipping	1	each	515	Shipping costs	515	2017-04-14
Peninsula Crane and Rigging	408 294 4841	1	each	2290	Riggers to setup table - Joe Bauer and Richard White	2290
Peninsula Crane and Rigging	408 294 4841	1	each	1160	Riggers to install seismic bracing	1160
Microscope Stage	30852.2	-	-	(5% discount)	-
Ludl Elect. Prod.	96A602	1	each	11519.7	Ludl Piezo Z-axis insert, 350um for MAC6000 (use 96S107 Stage)	11519.7	2017-04-25
Ludl Elect. Prod.	73006063	1	each	1347.1	Ludl Piezo Z-axis driver, MAC6000	1347.1	2017-04-25
Ludl Elect. Prod.	96S107-N3-LE2	1	each	12903.9	Stage, Flat Top pz Nikon Ti2-U St Motors/Inverted/Lin-Enc 50n	12903.9	2017-04-25
Ludl Elect. Prod.	996052	1	each	4341.5	Controller, MAC6000 XY Stage Stepper, Includes Joystick	4341.5	2017-04-25
Ludl Elect. Prod.	99A074	1	each	740.05	Adjustable insert for slide/petri dish – inverted stage	740.05	2017-04-25			http://ludl.com/stage-accessories/inventory/--13/
Lasers	82797
Coherent	1284370	1	each	4784.6	OBIS 405nm LX 50mW LASER SYSTEM	4784.6
Coherent	1220124	1	each	8267.37	OBIS 488nm LX 150 mW Laser System	8267.37	2017-06-13
MPB	2RU-VFL-P-2000-560-B1R	1	each	22325	2000mW at 560nm Laser	22325	2017-04-03
MPB	2RU-VFL-P-2000-647-B1R	1	each	24652.5	2000mW at 647nm Laser	24652.5	2017-04-03
MPB	2RU-VFL-P-500-750-B1R	1	each	22400	500mW at 750 nm Laser	22400
eMachineShop	MPB_mount.ems	1	set of 3	261.79	Custom machined plate for MPB laser mount	261.79	2017-05-26
eMachineShop	Coheren_mount.ems	1	set of 1	105.725	Custom macined plate for OBIS laser mount	105.725	2017-05-26
Camera	19475			(5% discount)
Hamamatsu via Nikon	C11440-22CUPLUS-KIT	1	each	17575	ORCA-Flash4.0 V2+ CMOS Camera Kit	17575	2017-04-03
Hamamatsu via Nikon	CAMRA-1001-000-KIT	1	each	1900	Camera Link Interface Kit for C11440-22CU	1900	2017-04-03
Laser Optics	10534.5
Newport Optics	GBS-AR14	0	each	6210	Refractive Beam Shaper, 430-700nm	0
AVR (Semrock)	Di03-R405-t3-25D	1	each	665	405 nm laser BrightLine® single-edge super-resolution laser dichroic beamsplitter, 25mm round, 3mm thick	665				https://www.semrock.com/FilterDetails.aspx?id=Di03-R405-t3-25x36	combine beams	Get 25mm round 3mm
AVR (Semrock)	Di03-R488-t3-25D	0	each	665	488 nm laser BrightLine® single-edge super-resolution laser dichroic beamsplitter, 25mm round, 3mm thick	0	2017-06-16			https://www.semrock.com/FilterDetails.aspx?id=Di03-R488-t3-25x36	combine beams	Get 25mm round 3mm
AVR (Semrock)	Di03-R561-t3-25D	1	each	665	561 nm laser BrightLine® single-edge super-resolution laser dichroic beamsplitter, 25mm round, 3mm thick	517.75	2017-04-14			https://www.semrock.com/FilterDetails.aspx?id=Di03-R561-t3-25x36	combine beams	Get 25mm round 3mm
AVR (Semrock)	Di03-R635-t3-25D	1	each	665	635 nm laser BrightLine® single-edge super-resolution laser dichroic beamsplitter, 25mm round, 3mm thick	517.75	2017-04-14			https://www.semrock.com/FilterDetails.aspx?id=Di03-R635-t3-25x36	combine beams	Get 25mm round 3mm
Thorlabs	LA1433-A-ML	3	each	42.3	Ø1" Mounted N-BK7 Plano-Convex Lenses (AR Coating: 350 - 700 nm) f=150mm	126.9	2017-05-03			https://www.thorlabs.com/thorproduct.cfm?partnumber=LA1433-A-ML	for laser zoom system to adjust beam size
Thorlabs	LA1509-A-ML	3	each	43.6	Ø1" Mounted N-BK7 Plano-Convex Lenses (AR Coating: 350 - 700 nm) f=100mm	130.8	2017-05-03			https://www.thorlabs.com/thorproduct.cfm?partnumber=LA1509-A-ML	for laser zoom system to adjust beam size
Thorlabs	LA1433-B-ML	1	each	42.3	Ø1" Mounted N-BK7 Plano-Convex Lenses (AR Coating: 650 - 1050 nm) f =150mm	42.3					for laser zoom system to adjust beam size
Thorlabs	LA1509-B-ML	1	each	43.6	Ø1" Mounted N-BK7 Plano-Convex Lenses (AR Coating: 650 - 1050 nm) f = 100mm	43.6					for laser zoom system to adjust beam size
Thorlabs	LD2297-A	3	each	41.21	N-SF11 Bi-Concave Lens, Ø25.4 mm, f = -25.0 mm, ARC: 350-700 nm	123.63	2017-05-03			https://www.thorlabs.com/thorproduct.cfm?partnumber=LD2297-A	for laser zoom system to adjust beam size
Thorlabs	LD2297-B	1	each	41.21	N-SF11 Bi-Concave Lens, Ø25.4 mm, f = -25.0 mm, ARC:650 - 1050 nm	41.21					for laser zoom system to adjust beam size
Thorlabs	WPH05M-488	1	each	418.2	Ø1/2" Mounted Zero-Order Half-Wave Plate, Ø1" Mount, 488 nm	418.2				https://www.thorlabs.com/thorproduct.cfm?partnumber=WPH05M-488	To adjust beam polarization
Thorlabs	WPH05M-561	1	each	418.2	Ø1/2" Mounted Zero-Order Half-Wave Plate, Ø1" Mount, 561 nm	418.2	2017-05-03			https://www.thorlabs.com/thorproduct.cfm?partnumber=WPH05M-561	To adjust beam polarization
Thorlabs	WPH05M-633	1	each	418.2	Ø1/2" Mounted Zero-Order Half-Wave Plate, Ø1" Mount, 633 nm	418.2	2017-05-03			https://www.thorlabs.com/thorproduct.cfm?partnumber=WPH05M-633	To adjust beam polarization
Thorlabs	WPH05M-780	1	each	418.2	Ø1/2" Mounted Zero-Order Half-Wave Plate, Ø1" Mount, 780 nm	418.2				https://www.thorlabs.com/thorproduct.cfm?partnumber=WPH05M-780	To adjust beam polarization
Thorlabs	CRM1	3	each	78.94	Cage Rotation Mount for Ø1" Optics, SM1 Threaded, 8-32 Tap	236.82	2017-05-03		backordered	https://www.thorlabs.com/thorproduct.cfm?partnumber=CRM1	for mounting half-wave plates
Thorlabs	CP02	15	each	16	CP02 - SM1-Threaded 30 mm Cage Plate, 0.35" Thick, 2 Retaining Rings, 8-32 Tap	240	2017-05-03			https://www.thorlabs.com/thorproduct.cfm?partnumber=CP02	to mount laser zoom
Thorlabs	ER10	12	each	16.44	ER10 - Cage Assembly Rod, 10" (254.0 mm) Long, Ø6 mm	197.28	2017-05-03			https://www.thorlabs.com/thorproduct.cfm?partnumber=ER10	for laser zoom
Thorlabs	CF125-P5	8	5-pack	41.5	CF125-P5 - Short Clamping Fork, 1.24" Counterbored Slot, Universal, 5 Pack	332	2017-05-03			https://www.thorlabs.com/thorproduct.cfm?partnumber=CF125-P5	for anchoring mounts
Thorlabs	KM100-E02	13	each	103.5	KM100-E02 - Kinematic Mirror Mount for Ø1" Optics with Visible Laser Quality Mirror	1345.5	2017-05-03			https://www.thorlabs.com/thorproduct.cfm?partnumber=KM100-E02	mirrors
Thorlabs	KM200-E02	2	each	198	KM200-E02 - Kinematic Mirror Mount for Ø2" Optics with Visible Laser Quality Mirror	396	2017-05-03			https://www.thorlabs.com/thorproduct.cfm?partnumber=KM200-E02	mirrors for expanded beam
Thorlabs	PH1.5E	6	each	23	PH1.5E - Ø1/2" Pedestal Post Holder, Spring-Loaded Hex-Locking Thumbscrew, L=1.69"	138	2017-05-03			https://www.thorlabs.com/thorproduct.cfm?partnumber=PH1.5E	for mounting laser-zoom rail systems
Thorlabs	TR1.5-P5	2	each	22.37	TR1.5-P5 - Ø1/2" Optical Post, SS, 8-32 Setscrew, 1/4"-20 Tap, L = 1.5", 5 Pack	44.74	2017-05-03			https://www.thorlabs.com/thorproduct.cfm?partnumber=TR1.5-P5	for mounting laser-zoom rail systems
Thorlabs	PH082E	3	each	22.5	PH082E - Ø1/2" Pedestal Post Holder, Spring-Loaded Hex-Locking Thumbscrew, L=1.00"	67.5	2017-05-03			https://www.thorlabs.com/thorproduct.cfm?partnumber=PH082E	for mounting beam expander
Thorlabs	TR1	3	each	4.74	TR1 - Ø1/2" Optical Post, SS, 8-32 Setscrew, 1/4"-20 Tap, L = 1"	14.22	2017-05-03			https://www.thorlabs.com/thorproduct.cfm?partnumber=TR1	for mounting beam expander
Edmund Optics	49-395	1	each	145	50mm Dia. x 350mm FL, VIS-NIR, Achromatic Lens	145	2017-05-02			http://www.edmundoptics.com/optics/optical-lenses/achromatic-lenses/vis-nir-coated-achromatic-lenses/49395/	for beam expander
Edmund Optics	49-352	2	each	94	25mm Dia. x 30mm FL, VIS-NIR Coated, Achromatic Lens	188	2017-05-02			http://www.edmundoptics.com/optics/optical-lenses/achromatic-lenses/vis-nir-coated-achromatic-lenses/49352/	for beam expander
Edmund Optics	49-392	1	each	145	50mm Dia. x 200mm FL, VIS-NIR Coated, Achromatic Lens	145	2017-05-02			http://www.edmundoptics.com/optics/optical-lenses/achromatic-lenses/vis-nir-coated-achromatic-lenses/49392/	for beam expander
Thorlabs	SM1L05-P5	1	5-pk	59.8	SM1 Lens Tube, 0.50" Thread Depth, SM1RR Retaining Ring, 5 Pack	59.8	2017-05-03				2 for edmund 25mm achromatic
Thorlabs	ER12	8	each	16.44	ER12 - Cage Assembly Rod, 12" (304.8 mm) Long, Ø6 mm	131.52	2017-05-03			https://www.thorlabs.com/thorproduct.cfm?partnumber=ER12	for beam expander
Thorlabs	CDA1	4	each	30	CDA1 - Drop-In 30 mm to 60 mm Cage System Adapter, Qty. 1	120	2017-05-03			https://www.thorlabs.com/thorproduct.cfm?partnumber=CDA1	attach 1" optics in beam expander
Thorlabs	ER1-P4	2	4-pack	18.77	ER1-P4 - Cage Assembly Rod, 1" (25.4 mm) Long, Ø6 mm, 4 Pack	37.54	2017-05-03			https://www.thorlabs.com/thorproduct.cfm?partnumber=ER1-P4	attach 1" optics in beam expander and connect periscope
Thorlabs	ER05-P4	3	4-pack	18.77	ER05-P4 - Cage Assembly Rod, 0.5" Long, Ø6 mm, 4 Pack	56.31	2017-05-03			https://www.thorlabs.com/thorproduct.cfm?partnumber=ER05-P4	connect periscope
Thorlabs	ER025	8	each	5.05	ER025 - Cage Assembly Rod, 1/4" Long, Ø6 mm	40.4	2017-05-03			https://www.thorlabs.com/thorproduct.cfm?partnumber=ER025	height flexibility for periscope
Thorlabs	CXY1	2	each	169.05	CXY1 - 30 mm Cage XY Translator for Ø1" Optics with Quick-Release Mounting Carriage	338.1	2017-05-03			https://www.thorlabs.com/thorproduct.cfm?partnumber=CXY1	attach 1" optics in beam expander
Thorlabs	XRN25C	1	each	362.7	XRN25C - Compact 25 mm Travel Linear Translation Stage, Rear Micrometer, 1/4"-20 Taps	362.7	2017-05-03		backordered	https://www.thorlabs.com/thorproduct.cfm?partnumber=XR25C	For TIRF
Thorlabs	PH3	1	each	9.17	PH3 - Ø1/2" Post Holder, Spring-Loaded Hex-Locking Thumbscrew, L = 3"	9.17	2017-05-03			https://www.thorlabs.com/thorproduct.cfm?partnumber=PH3	For mounting TIRF
Thorlabs	TR3	1	each	5.43	TR3 - Ø1/2" Optical Post, SS, 8-32 Setscrew, 1/4"-20 Tap, L = 3"	5.43	2017-05-03			https://www.thorlabs.com/thorproduct.cfm?partnumber=TR3	For mounting TIRF
Thorlabs	CXY2	2	each	185	CXY2 - 60 mm Cage System Translating Lens Mount for Ø2" Optics	370	2017-05-03			https://www.thorlabs.com/thorproduct.cfm?partnumber=CXY2	for beam expander and back lens
Thorlabs	SM2L05	2	each	24.75	SM2L05 - SM2 Lens Tube, 0.5" Thread Depth, One Retaining Ring Included	49.5	2017-05-03			https://www.thorlabs.com/thorproduct.cfm?partnumber=SM2L05	for mounting 2" diameter lenses
Thorlabs	LCPMA1	2	each	35	LCPMA1 - Snap-On 60 mm Cage Mounting Bracket, #8 (M4) Slot	70	2017-05-03			https://www.thorlabs.com/thorproduct.cfm?partnumber=LCPMA1	for mounting periscope
Thorlabs	ERSCA	1	4-pack	42.14	ERSCA-P4 - Rod Adapter for Ø6 mm ER Rods, 4 Pack	42.14	2017-05-03			https://www.thorlabs.com/thorproduct.cfm?partnumber=ERSCA-P4	for connecting periscope parts
Thorlabs	ER2	4	each	5.94	ER2 - Cage Assembly Rod, 2" (50.8 mm) Long, Ø6 mm	23.76	2017-05-03				for periscope
Thorlabs	CV1530	1	each	179	CV1530 - Vertical 30 mm Cage Clamp for Ø1.5" Posts	179	2017-05-03			https://www.thorlabs.com/thorproduct.cfm?partnumber=CV1530	for holding periscope
Thorlabs	P6	1	each	50	P6 - Ø1.5" Mounting Post, 1/4"-20 Taps, L = 6"	50	2017-05-03			https://www.thorlabs.com/newgrouppage9.cfm?objectgroup_id=1313&pn=P6#175	mount periscope
Thorlabs	BBE2-E02	2	each	185	BBE2-E02 - 2" Broadband Dielectric Elliptical Mirror, 400 - 750 nm	370	2017-05-03			https://www.thorlabs.com/thorproduct.cfm?partnumber=BBE2-E02	for periscope
Thorlabs	ND20A	4	each	68.34	ND20A - Reflective Ø25 mm ND Filter, SM1-Threaded Mount, Optical Density: 2.0	273.36	2017-05-03			https://www.thorlabs.com/thorproduct.cfm?partnumber=ND20A	reduce laser power for aligning beam
Thorlabs	RS1.5P	10	each	23.75	RS1.5P - Ø1" Pedestal Pillar Post, 1/4"-20 Taps, L = 1.5"	237.5	2017-05-03			https://www.thorlabs.com/thorproduct.cfm?partnumber=RS1.5P	Mounts for 2" mirrors and for laser plates (to match 2" mounts for 1" mirrors)
Thorlabs	PB4	1	each	12.4	PB4 - Studded Pedestal Base Adapter, 1/4"-20 Thread	12.4	2017-05-03			https://www.thorlabs.com/thorproduct.cfm?partnumber=PB4	mount periscope
Thorlabs	PF175	1	each	17.47	PF175 - Clamping Fork for Ø1.5" Pedestal Post or Post Pedestal Base Adapter, Universal	17.47	2017-05-03			https://www.thorlabs.com/thorproduct.cfm?partnumber=PF175	mount periscope
Thorlabs	KCB2E	1	each	225	KCB2E - Right-Angle Kinematic Elliptical Mirror Mount, 60 mm Cage System and SM2 Compatible, 8-32 and 1/4"-20 Mounting Holes	225				https://www.thorlabs.com/thorproduct.cfm?partnumber=KCB2E	for periscope
Thorlabs	LCP01	1	each	37.1	60 mm Cage Plate, SM2 Threaded, 0.5" Thick, 8-32 Tap (Two SM2RR Retaining Rings Included)	37.1					for beam expansion cage and periscope
Thorlabs	SM1V05	1	each	30.25	SM1V05 - Ø1" Adjustable Lens Tube, 0.31" Travel Range	30.25	2017-05-03			https://www.thorlabs.com/thorproduct.cfm?partnumber=SM1V05	for beam expansion after AOTF before beam-shaper
Thorlabs	SM1L10	1	each	14.25	SM1L10 - SM1 Lens Tube, 1.00" Thread Depth, One Retaining Ring Included	14.25	2017-05-03			https://www.thorlabs.com/thorproduct.cfm?partnumber=SM1L10	for beam expansion after AOTF before beam-shaper
AOTF	5911.46
Gooch and Housego	97-03309-01	1	each	2450	AOTF, 488-800 nm	2450	2017-04-14		2017-04-25
Gooch and Housego	97-03926-12	1	each	2875	DDS driver (8-chn) for AOTF	2875	2017-04-14		2017-04-25
Gooch and Housego	38-00028-01	1	each	35	24V Power Supply	35	2017-04-14		2017-04-25
Gooch and Housego	Software CD	1	each	0	Software CD	0	2017-04-14		2017-04-25
Gooch and Housego	31-81822-02	1	each	95	40 pin MDR cable, 2 meter	95	2017-04-14		2017-04-25
Gooch and Housego	86-00136-02	1	each	195	temperature sensor	195	2017-04-14		2017-04-25
Thorlabs	T3283	1	each	6.8	BNC Adapter - Straight Adapter (F-F)	6.8	2017-05-03			https://www.thorlabs.com/thorproduct.cfm?partnumber=T3283	for joining SMA cables to make long SMA
Thorlabs	CA2848	2	each	17.5	CA2848 - SMA Coaxial Cable, SMA Male to BNC Male, 48" (1219 mm)	35	2017-05-03			https://www.thorlabs.com/thorproduct.cfm?partnumber=CA2848	SMA cables to join
Thorlabs	PB4	1	each	12.4	PB4 - Studded Pedestal Base Adapter, 1/4"-20 Thread	12.4	2017-05-03			https://www.thorlabs.com/thorproduct.cfm?partnumber=PB4	mount AOTF
Thorlabs	PF175	1	each	17.47	PF175 - Clamping Fork for Ø1.5" Pedestal Post or Post Pedestal Base Adapter, Universal	17.47	2017-05-03			https://www.thorlabs.com/thorproduct.cfm?partnumber=PF175	mount AOTF
Thorlabs	TR8	1	each	8.12	TR8 - Ø1/2" Optical Post, SS, 8-32 Setscrew, 1/4"-20 Tap, L = 8"	8.12	2017-05-03			https://www.thorlabs.com/thorproduct.cfm?partnumber=TR8	For mounting AOTF
Thorlabs	RA90	2	each	9.76	RA90 - Right-Angle Clamp for Ø1/2" Posts, 3/16" Hex	19.52	2017-05-03			https://www.thorlabs.com/thorproduct.cfm?partnumber=RA90	For mounting AOTF
eMachineShop	ATOF_mount.ems	1	each	157.16	aluminum mounting plate for AOTF, custom machined	157.16	2017-05-26
Amazon		1	each	4.99	AmazonBasics USB 2.0 Cable - A-Male to B-Male - 6 Feet (1.8 Meters)	4.99				AmazonBasics USB 2.0 Cable - A-Male to B-Male - 6 Feet (1.8 Meters)	to run AOTF
Focus Lock	7063.08
Thorlabs	SM1A30	1	each	60.8	Nikon Eclipse Ti Microscope Epi-Fluorescence Port Adapter, Internal SM1 Threads, 30 and 60 mm Cage Compatibility	60.8	2017-05-03				for attaching focus lock system to scope
Thorlabs	LDC210C	1	each	1040	Benchtop LD Current Controller, ±1 A HV	1040	2017-05-03			https://www.thorlabs.com/thorproduct.cfm?partnumber=LDC210C	power supply for IR laser
Thorlabs	LDM9LP	1	each	617	LD/TEC Mount for Thorlabs Fiber-Pigtailed Laser Diodes	617	2017-05-03			https://www.thorlabs.com/newgrouppage9.cfm?objectgroup_id=4839&pn=LDM9LP	Mount and temp control for IR laser
Thorlabs	LP940-SF30	1	each	690	940 nm 30 mW Thorlabs Fiber-Pigtailed Laser Diode	690	2017-05-03		backordered		IR laser fiber		980 nm, 15 mW, E Pin Code, SM Fiber-Pigtailed Laser Diode, FC/PC
Thorlabs	NENIR10A	1	each	57	Ø25 mm NIR Absorptive ND Filter, SM1-Threaded Mount, OD: 1.0	57	2017-05-03			https://www.thorlabs.com/thorproduct.cfm?partnumber=NENIR10A	modulate laser power
Thorlabs	NENIR20A	1	each	57	Ø25 mm NIR Absorptive ND Filter, SM1-Threaded Mount, OD: 2.0	57	2017-05-03			https://www.thorlabs.com/thorproduct.cfm?partnumber=NENIR20A	modulate laser power
Thorlabs	DCC1545M	1	each	355	High Resolution USB2.0 CMOS Camera, 1280 x 1024, Monochrome Sensor	355	2017-05-03			https://www.thorlabs.com/thorproduct.cfm?partnumber=DCC1545M	IR camera
Thorlabs	PAFA-X-4-B	1	each	515	Achromatic FiberPort, FC/PC & FC/APC, f = 4.00 mm, 650 - 1050 nm, Ø0.87 mm Waist	515	2017-05-03			https://www.thorlabs.com/thorproduct.cfm?partnumber=PAFA-X-4-B	Fiber port
Thorlabs	CP08FP	1	each	28	FiberPort and LaserPort Adapter for 30 mm Cage System, Enhanced Clamping	28	2017-05-03			https://www.thorlabs.com/thorproduct.cfm?partnumber=CP08FP	Mount for fiber port
Thorlabs	LA1608-B-ML	1	each	43.6	Ø1" N-BK7 Plano-Convex Lens, SM1-Threaded Mount, f = 75.0 mm, ARC: 650-1050 nm	43.6	2017-05-03			https://www.thorlabs.com/thorproduct.cfm?partnumber=LA1608-B-ML	Focus spots onto camera
Thorlabs	LA1172-B-ML	1	each	41.9	Ø1" N-BK7 Plano-Convex Lens, SM1-Threaded Mount, f = 400.0 mm, ARC: 650-1050 nm	41.9	2017-05-03			https://www.thorlabs.com/thorproduct.cfm?partnumber=LA1172-B-ML	Focus spots onto objective (might try different lenses)
Thorlabs	CXY1	1	each	169.05	30 mm Cage XY Translator for Ø1" Optics with Quick-Release Mounting Carriage	169.05	2017-05-03			https://www.thorlabs.com/thorproduct.cfm?partnumber=CXY1	Mount and adjust lens to focus on objective
Thorlabs	CT1	1	each	418	1/2" Translation Stage for Cage System	418	2017-05-03			https://www.thorlabs.com/newgrouppage9.cfm?objectgroup_id=1895	Offset control for final lens focusing onto camera
Thorlabs	CT101	1	each	43.1	Optic Mount for use with CT1 in 30 mm Cage System	43.1	2017-05-03			https://www.thorlabs.com/newgrouppage9.cfm?objectgroup_id=1895	Offset control for final lens focusing onto camera
Thorlabs	BB1-E03	2	each	75.1	BB1-E03 - Ø1" Broadband Dielectric Mirror, 750-1100 nm	150.2	2017-05-03			http://www.thorlabs.com/thorproduct.cfm?partnumber=BB1-E03	IR mirrors
Thorlabs	KCB1C	2	each	139.94	Right-Angle Kinematic Mirror Mount with Tapped Cage Rod Holes, 30 mm Cage System and SM1 Compatible, 8-32 and 1/4"-20 Mounting Holes	279.88	2017-05-03			https://www.thorlabs.com/newgrouppage9.cfm?objectgroup_id=6813&pn=KCB1C	Mirror mounts
Thorlabs	C6WA	2	each	41.2	C6W Platform Adapter Kit	82.4	2017-05-03				for rotating beam splitter
Thorlabs	C6W	2	each	61.2	30 mm Cage Cube, Ø6 mm Through Holes	122.4	2017-05-03				for rotating beam splitter
Thorlabs	B4CRP	2	each	283	30 mm Cage Cube Precision Kinematic Rotation Platform	566	2017-05-03				for rotating beam splitter
Thorlabs	BS017	2	each	190	50:50 Non-Polarizing Beamsplitter Cube, 700-1100 nm, 20 mm	380	2017-05-03				for rotating beam splitter
Thorlabs	PM3	2	each	18	Small Adjustable Clamping Arm, 6-32 Threaded Post	36	2017-05-03				for rotating beam splitter
Thorlabs	ER2-P4	6	4-pack	22.57	Cage Assembly Rod, 2" (50.8 mm) Long, Ø6 mm, 4 Pack	135.42	2017-05-03			http://www.thorlabs.com/thorproduct.cfm?partnumber=ER2-P4	cage system for IR optics
Thorlabs	ER6-P4	1	4-pack	31.42	ER6-P4 - Cage Assembly Rod, 6" (152.4 mm) Long, Ø6 mm, 4 Pack	31.42	2017-05-03			https://www.thorlabs.com/thorproduct.cfm?partnumber=ER6-P4	cage connector to camera
Thorlabs	ERSCA	12	each	10.8	ERSCA - Rod Adapter for Ø6 mm ER Rods	129.6	2017-05-03			https://www.thorlabs.com/thorproduct.cfm?partnumber=ERSCA
Thorlabs	CP02	2	each	16	CP02 - SM1-Threaded 30 mm Cage Plate, 0.35" Thick, 2 Retaining Rings, 8-32 Tap	32	2017-05-03			https://www.thorlabs.com/thorproduct.cfm?partnumber=CP02
Thorlabs	CM1-BP145B3	1	each	268	30 mm Cage Cube-Mounted Pellicle Beamsplitter, 45:55 (R:T), 1 - 2 µm	268	2017-05-03			http://www.thorlabs.com/thorproduct.cfm?partnumber=CM1-BP145B3	To send light to camera, pellicle to reduce back-scatter from final beam splitter
Thorlabs	NENIR60A	1	each	57	NENIR60A - Ø25 mm NIR Absorptive ND Filter, SM1-Threaded Mount, OD: 6.0	57	2017-05-03			https://www.thorlabs.com/thorproduct.cfm?partnumber=NENIR60A	to deflect back-scatter away from camera
Thorlabs	SM1L03T	1	each	48	SM1L03T - 10° Angled Optic Mount for 1" Optics with SM1 Threading	48	2017-05-03			https://www.thorlabs.com/thorproduct.cfm?partnumber=SM1L03T	to deflect back-scatter away from camera
Thorlabs	SM1CP2	1	each	17	SM1CP2 - Externally SM1-Threaded End Cap	17	2017-05-03			https://www.thorlabs.com/thorproduct.cfm?partnumber=SM1CP2	to deflect back-scatter away from camera
Thorlabs	SM1A9	1	each	18.75	SM1A9 - Adapter with External C-Mount Threads and Internal SM1 Threads	18.75	2017-05-03			https://www.thorlabs.com/thorproduct.cfm?partnumber=SM1A9	to mount IR camera
Thorlabs	PH4E	3	each	24.5	PH4E - Ø1/2" Pedestal Post Holder, Spring-Loaded Hex-Locking Thumbscrew, L=4.19"	73.5	2017-05-03			https://www.thorlabs.com/thorproduct.cfm?partnumber=PH4E
Thorlabs	TR6	3	each	6.77	TR6 - Ø1/2" Optical Post, SS, 8-32 Setscrew, 1/4"-20 Tap, L = 6"	20.31	2017-05-03			https://www.thorlabs.com/newgrouppage9.cfm?objectgroup_id=1266&pn=TR6#237
AVR (Semrock)	FF01-935/170-25	1	each	384.75	935/170 nm BrightLine® single-band bandpass filter	384.75	2017-04-14			https://www.semrock.com/FilterDetails.aspx?id=FF01-935/170-25	To prevent room light getting to IR camera
AVR (Semrock)		1	each	95	Custom sizing fee for filter	95	2017-04-14
Other Parts	64.94
Amazon		2	each	19.99	Sabrent 13 Port High Speed USB 2.0 Hub with Power Adapter And 2 Control Switches (HB-U14P)	39.98	2017-06-20			http://www.amazon.com/Sabrent-Adapter-Control-Switches-HB-U14P/dp/B00HL7Z46K/ref=sr_1_15?ie=UTF8&qid=1461345814&sr=8-15&keywords=USB+hub
Amazon		1	2-pack	9.97	AmazonBasics 6-Outlet Surge Protector Power Strip 2-Pack, 200 Joule - Black	9.97				http://www.amazon.com/AmazonBasics-6-Outlet-Surge-Protector-2-Pack/dp/B014EKQ5AA/ref=sr_1_3?ie=UTF8&qid=1461346017&sr=8-3&keywords=power+strip
Amazon		1	2-pack	14.99	10-Feet Power Cord Extension - NEMA 5-15R to NEMA 5-15P	14.99	2017-06-20			2 of StarTech.com PAC10110 10-Feet Power Cord Extension - NEMA 5-15R to NEMA 5-15P
Timing Control	3106.2	Quote Requested
National Instruments	781049-01	1	each	1508.4	NI PCIe-6353	1508.4	2017-04-14			http://sine.ni.com/nips/cds/view/p/lang/en/nid/207410
National Instruments	192061-02	2	each	138.6	NI Cables - Shielded, for PCIe-6353	277.2	2017-04-14			http://sine.ni.com/nips/cds/view/p/lang/en/nid/207410
National Instruments	777664-01	1	each	282.6	CA-1000 Connector Accessory Enclosure	282.6	2017-04-14			http://sine.ni.com/nips/cds/view/p/lang/en/nid/1835
National Instruments	184721-01	1	each	63	Strain Relief Connector Panelette for CA-1000 Style Enclosure	63	2017-04-14			http://sine.ni.com/nips/cds/view/p/lang/en/nid/10713
National Instruments	184737-01	4	each	49.5	BNC Connector Panelette, CA-1000 Style Enclosure	198	2017-04-14			http://sine.ni.com/nips/cds/view/p/lang/en/nid/10713
National Instruments	777145-02	2	each	113.4	CB-68LPR I/O Connector Block	226.8	2017-04-14			http://sine.ni.com/nips/cds/view/p/lang/en/nid/1186
National Instruments	184483-01	3	each	12.6	Blank Connector Panelette for the CA-1000 Style Enclosure	37.8	2017-04-14			http://sine.ni.com/nips/cds/view/p/lang/en/nid/10688
National Instruments	782606-01	1	each	365.4	Low-Cost Multifunction DAQ, 16-bit, 50 kS/s, 8 AI, 2 AO, 13 DIO	365.4	2017-04-14			http://sine.ni.com/nips/cds/view/p/lang/en/nid/212384	For focus drive
National Instruments	782909-01	1	each	19.8	High Speed USB Cable - Micro to STD Male (1m)	19.8	2017-04-14			http://sine.ni.com/nips/cds/view/p/lang/en/nid/212384	for focus drive
Thorlabs	CA2672	2	each	44.2	CA2672 - SMC Coaxial Cable, SMC Female to BNC Male, 72" (1829 mm)	88.4	2017-05-03			https://www.thorlabs.com/thorproduct.cfm?partnumber=CA2672	connect 405 and 488 laser to National instruments panel
Thorlabs	CA3136	2	each	16	CA3136 - RG-174 BNC Coaxial Cable, BNC Male to BNC Male, 36" (914 mm)	32	2017-05-03			https://www.thorlabs.com/thorproduct.cfm?partnumber=CA3136	connect IR laser to National Instruments panel
Thorlabs	T3283	1	each	6.8	BNC Adapter - Straight Adapter (F-F)	6.8	2017-05-03			https://www.thorlabs.com/thorproduct.cfm?partnumber=T3283	for Peizo-Z output (might not need)
Thorlabs	2249-C-60	1	each	18.5	2249-C-60 - RG-58 BNC Coaxial Cable, BNC Male to BNC Male, 60" (1524 mm)		2017-05-03			https://www.thorlabs.com/thorproduct.cfm?partnumber=2249-C-60	for Peizo-Z output
Microscope Body	20737.2	Quote Requested
Nikon	MEA53200	1	each	7038	Inverted Microscope Eclipse Ti-U Main Body,with: left and rightside ports, intermediate magnification changer 1.5X, coaxial coarse/finefocus w/tension adjustment on coarse and focus stop on coarse, laser safety interlock signal output; Light-distribution: 100 Eyepiece, 100Left, 100 Right (*), and Auxiliary position (*) Note: (*) prism can beexchanged for optional prisms; Eye20/Left80, Eye20/Right…	7038	2017-04-03
Nikon	MEV51005	2	each	750.55	TI-FLC Epi-FL Filter Turret Six position turret, ergonomicallypositioned light shut-off shutter, "Noise Terminator" included for highsignal-to-noise fluorecence images	1501.1	2017-04-03
Nikon	MQD42070	1	each	532.1	0.7x C-Mount Relay Lens	532.1	2017-04-03
Nikon	MED53200	1	each	938.4	Ti-BSUK70 70mm Stage Up Kit	938.4	2017-04-03
Nikon	MRD01605	1	each	5078.75	CFI Plan Apo Lambda 60x oil 0.13mm, F.O.V. 25mm, DIC	5078.75	2017-04-03
Nikon	MRH00101	1	each	800	CFI60 Plan Fluor 10x Objective Lens, N.A. 0.3, W.D. 16mm, F.O.V. 25mm, DIC	800	2017-04-03
Nikon	MEP53315	1	each	1164.5	Ti-ND6 Sextuple DIC Nosepiece	1164.5	2017-04-03
Nikon	MEB55800	1	each	290.7	Ti-T-B Eyepiece Base Unit (to mount front of stage)	290.7	2017-04-03
Nikon		1	each	159.8	T-DH Dia-Illuminator Base Kit (replaces tower arm, to mount back of stage)	159.8	2017-04-03
Shapeways	none	1	each	17.05	Custom 3D printing of Nikon Filter Holder 1 -LARGE SIZE (UPDATE PRICE)	17.05	2017-06-20				to hold IR filter
Chroma	ZT405/488/561/647/752rpc-UF2	1	each	1100	Penta-band polychroic mirror 32 x 44 x 2mm	1100	2018-07-03			20% discount!
Chroma	ZET405/488/561/647-656/752	1	each	680	Penta-band emission/barrier/notch filter, 25mm diameter, to be mounted in 91032 Nikon laser/TIRF filtercube for Nikon Ti	680	2018-07-03			20% discount!
Chroma	91054	2	each	318.4	Nikon Ti-2 Filter Cube	636.8	2018-07-03			20% discount!
Chroma	900DCSP	1	each	800	900DCSP shortpass dichroic mirror, 32 x 44 x 2 (CHECK THAT WE ACTUALLY SIZED UP HERE)	800	2017-04-14			20% discount	Reflects IR beam for focus lock
Edmund Optics	#64-334	1	each	215	850nm 25mm Diameter, OD 4 Shortpass Filter (UPDATE TO 32 mm Diameter)	215	2017-05-02			http://www.edmundoptics.com/optics/optical-filters/shortpass-edge-filters/high-performance-od-4-shortpass-filters/64334/	to block backscatter IR from hcam
Fluidics System	8128.77
Hamilton	4833 -01	1	each	93	Power Supply. UNIV24VDC.1/7A	93	2017-04-12		2017-04-25		Call or email Hamilton and order, didn't go through website
Hamilton	7750-16	1	6/pk	63.9	25 gauge, Kel-F Hub NDL, custom length (4 in), point style 3, 6/PK	63.9	2017-04-12			https://www.hamiltoncompany.com/products/syringes-and-needles/needles/luer-lock-needles/kel-f-hub-needles/25-gauge-KelF-Hub-NDL-custom-length-0375-to-12-in-point-style-2-3-or-4-6PK
Hamilton	36782	2	each	172	HVXM 8-7 VALVE	344	2017-04-12		2017-04-25
Hamilton	77902	1	each	43	MVP Output to MVP Input Cable	43	2017-04-12		2017-04-25	http://www.hamiltoncompany.com/products/MVP-Output-to-MVP-Input-Cable
Hamilton	36798	1	each	950	MVP RS-232, PC1, w/o Valve	950	2017-04-12		2017-04-25	http://www.hamiltoncompany.com/products/MVPRS232PC1WO-VALVE
Gilson	F155006	1	each	2438	Peristaltic pump	2438	2017-04-24				On Gilson quote
Gilson	361832	1	each	436	361832 361832: 508 INTERFACE MODULE, 110-220 VOLT	436	2017-04-24				On Gilson quote
Gilson	F117933	1	pk-12	41	PVC Manifold Tubing, 0.38 mm ID (0.015"), orange/green collars	41	2017-04-24				On Gilson quote
Gilson	21061820	1	each	0	SFW,GILSON SERVER FOR XP AND 7	0	2017-04-24				On Gilson quote
Bioptechs	03060319-2-NH	1	each	2686.86	FCS2 Chamber Flow Cell	2686.86	2017-04-24			http://www.bioptechs.com/Products/Prices/prices.html	Not needed yet (for flow)
Bioptechs	060319-2-2611	1	each	970.26	Zeiss (K), Marzhauser, ASI, Ludl & Prior Adapter	970.26	2017-04-24			http://www.bioptechs.com/Products/Prices/prices.html	Not needed yet (for flow)
Bioptechs	1907 -250	0	set-5	37.32	Blank Gasket cut using die# 443792, 0.25mm Thick – 5/pack – 1907-250	0
Bioptechs	1907 -750	0	set-5	37.32	Blank Gasket cut using die# 443792, 0.75mm Thick – 5/pack – 1907-250	0
Bioptechs	1907 -750	0	set-5	37.32	Blank Gasket cut using die# 527762, 0.75mm Thick – 5/pack – 1907-250	0				http://216.92.84.132/wordpress/product/chamber-accessories/	Not needed yet (for flow)
Bioptechs	1907 -750	0	set-5	37.32	Blank Gasket cut using die# 449379-D, 0.75mm Thick – 5/pack – 1907-250	0				http://216.92.84.132/wordpress/product/chamber-accessories/	Not needed yet (for flow)
Bioptechs	40-1313 -03192	0	500pk	522	40mm Coverslips	0					Not needed yet (for flow)
Bioptechs	Discount	0	each	-432.88	Lab startup discount	0
Amazon	Pcard	1	each	22.95	Keyspan by Tripp Lite USA-19HS High-Speed USB Serial Adapter, PC, MAC, supports Cisco Break Sequence	22.95				http://www.amazon.com/Tripp-Lite-USA-19HS-High-Speed-supports/dp/B0000VYJRY/ref=sr_1_1?ie=UTF8&qid=1453835083&sr=8-1&keywords=tripp-lite+keyspan+usa-19hs
Amazon	Pcard	1	each	9.99	Anker Ultra Slim 4-Port USB 3.0 Data Hub	9.99				http://www.amazon.com/AmazonBasics-Port-2-5A-power-adapter/dp/B00DQFGH80
Amazon	Pcard	1	each	3.45	StarTech 6-Feet Straight Through Serial Cable - DB9 F/F (MXT100FF)	3.45				http://www.amazon.com/StarTech-6-Feet-Straight-Through-Serial/dp/B00066HP2E
Amazon	Pcard	3	each	5.79	AmazonBasics USB 3.0 Extension Cable - A-Male to A-Female - 9.8 Feet	17.37				http://www.amazon.com/AmazonBasics-USB-3-0-Extension-Cable/dp/B00NH134L6
Amazon	Pcard	1	2-pack	8.99	CableCreation [2-PACK] 3 Feet 18 AWG Universal Power Cord for NEMA 5-15P to IEC320C13 Cable, 0.915M / Black	8.99				http://www.amazon.com/SF-Cable-Universal-Power-IEC320/dp/B006W0IHPW?ie=UTF8&psc=1&redirect=true&ref_=ox_sc_act_title_1&smid=A33MASNQGU8ZOV
IDEX/Upchurch	P -675	0	each	9.23	1/4-28 Female to Male Luer Assy	0				https://www.idex-hs.com/checkout/cart/configure/id/46408/
IDEX	XP -202	0	each	2.41	Flangeless Fitting Delrin®, Red 1/4-28 Flat-Bottom, for1/16" OD	0				https://www.idex-hs.com/flangeless-fitting-delrinr-red-1-4-24-flat-bottom-for1-16-od.html
McMaster	5583k52	0	each	212	Abrasion-Resistant White ETFE Tubing, .020" ID, 1/16" OD, 50ft	0
Amazon	pcard	0	assorted	42.44	Assorted tubing from Amazon	0
eBay	CNC3040T	1	each	445.01	3 AXIS USB Router Engraver Engraving Drilling Milling Machine, 300 x 400 mm (maybe not right size)	445.01				https://www.ebay.com/itm/CNC3040T-3-AXIS-USB-Router-Engraver-Engraving-Drilling-Milling-Machine-300x400/163143304813?epid=5029963288&hash=item25fc19466d:g:OMQAAOSwojdbNZ7H:sc:FedExHomeDelivery!94305!US!-1
Laser Safety	0
Microscope Enclosure	691.27									http://www.mcmaster.com/#t-slotted-framing/=13k1al5
Late Additions
Hamilton	7750-16	1	6/pk	71	25 gauge, Kel-F Hub NDL, custom length (5 in), point style 3, 6/PK	71	2017-07-14			https://www.hamiltoncompany.com/products/syringes-and-needles/needles/luer-lock-needles/kel-f-hub-needles/25-gauge-KelF-Hub-NDL-custom-length-0375-to-12-in-point-style-2-3-or-4-6PK
Thorlabs	LB1	2	each	49.5	Beam Block, 400 - 700 nm, 10 W Max Avg. Power, CW Only, Includes TR3 Post	90	2017-07-18
Thorlabs	ER2-P4	2	4-pack	23.18	Cage Assembly Rod, 2" (50.8 mm) Long, Ø6 mm, 4 Pack	23.18	2017-07-18
Thorlabs	SM1CP2	3	each	17.4	SM1CP2 - Externally SM1-Threaded End Cap	52.2	2017-07-18
Thorlabs	ERSCA-P4	1	4-pack	42.14	ERSCA - Rod Adapter for Ø6 mm ER Rods	42.14	2017-07-18
Thorlabs	XE25L09	4	each	15	9" Long Construction Rail	60	2017-07-18
Thorlabs	IDA20-P5	1	5-pack	213	IDA20-P5 - Post-Mountable Standard Iris, 20.0 mm Max Aperture, 8-32 Threaded Stud, Pack of 5	213	?
Thorlabs	SM1D12	1	each	57	SM1D12 - SM1 Lever-Actuated Iris Diaphragm (Ø0.8 - Ø12 mm)	57	?
Thorlabs	SM2D25D	1	each	82.75	SM2D25D - Ring-Actuated SM2 Iris Diaphragm	82.75	?
Thorlabs	RS1.5P	6	each	23.75	RS1.5P - Ø1" Pedestal Pillar Post, 1/4"-20 Taps, L = 1.5"	142.5	2017-05-03			https://www.thorlabs.com/thorproduct.cfm?partnumber=RS1.5P	Mounts for 2" mirrors and for laser plates (to match 2" mounts for 1" mirrors)
Thorlabs	BE1R	6	each	16.4	Ø1.25" Magnetic Studded Pedestal Base Adapter, 1/4"-20 Thread	98.4	2017-05-03			https://www.thorlabs.com/thorproduct.cfm?partnumber=RS1.5P	Mounts for 2" mirrors and for laser plates (to match 2" mounts for 1" mirrors)
