# Supplementary material for: Tracing DNA paths and RNA profiles in cultured cells and tissues with ORCA
Source: Springer Nature journal article supplement (doi:10.1038/s41596-020-00478-x), 2021-02-22
Supplement: MOESM8 [file 41596_2020_478_MOESM8_ESM39.xlsx]

## Sheet: Sheet1
FolderName	Readouts	DataType	HybNum	channels	fiducialChannel	channelLayout	bufferFrames	totalFrames	rnaNames
Readout_100	100	H	1	[647,561]	561	alternate	10	220	Abd-B Main Intron
Readout_101	101	H	2	[647,561]	561	alternate	10	220	Abd-B Main Exon
Readout_102	102	H	3	[647,561]	561	alternate	10	220	Abd-B Short Intron
Readout_103	103	H	4	[647,561]	561	alternate	10	220	Abd-B Short Exon
Readout_104	104	H	5	[647,561]	561	alternate	10	220	Abd-A Intron
Readout_105	105	H	6	[647,561]	561	alternate	10	220	Abd-A Exon
Readout_106	106	H	7	[647,561]	561	alternate	10	220	Ubx Intron
Readout_107	107	H	8	[647,561]	561	alternate	10	220	Ubx Exon
Readout_108	108	H	9	[647,561]	561	alternate	10	220	Antp Intron
Readout_109	109	H	10	[647,561]	561	alternate	10	220	Antp Exon
Readout_110	110	H	11	[647,561]	561	alternate	10	220	Scr intron
Readout_111	111	H	12	[647,561]	561	alternate	10	220	Scr Exon
Readout_112	112	H	13	[647,561]	561	alternate	10	220	Dfd Intron
Readout_113	113	H	14	[647,561]	561	alternate	10	220	Dfd Exon
Readout_114	114	H	15	[647,561]	561	alternate	10	220	pb Intron
Readout_115	115	H	16	[647,561]	561	alternate	10	220	pb Exon
Readout_116	116	H	17	[647,561]	561	alternate	10	220	lab Intron
Readout_117	117	H	18	[647,561]	561	alternate	10	220	lab Exon
Readout_118	118	H	19	[647,561]	561	alternate	10	220	Iab-4 ncGene
Readout_119	119	H	20	[647,561]	561	alternate	10	220	bxd_ncGene
Readout_120	120	H	21	[647,561]	561	alternate	10	220	inv Intron
Readout_121	121	H	22	[647,561]	561	alternate	10	220	inv Exon
Readout_122	122	H	23	[647,561]	561	alternate	10	220	en Whole Gene
Readout_123	123	H	24	[647,561]	561	alternate	10	220	ftz Whole Gene
Readout_124	124	H	25	[647,561]	561	alternate	10	220	zen Whole Gene
Readout_125	125	H	26	[647,561]	561	alternate	10	220	Ama Whole Gene
Readout_126	126	H	27	[647,561]	561	alternate	10	220	sna Whole Gene
Readout_127	127	H	28	[647,561]	561	alternate	10	220	elav Intron
Readout_128	128	H	29	[647,561]	561	alternate	10	220	elav Exon
