# Supplementary material for: Tracing DNA paths and RNA profiles in cultured cells and tissues with ORCA
Source: Springer Nature journal article supplement (doi:10.1038/s41596-020-00478-x), 2021-02-22
Supplement: MOESM9 [file 41596_2020_478_MOESM9_ESM40.xlsx]

## Sheet: Sheet1
FolderName	Readouts	DataType	HybNum	channels	fiducialChannel	channelLayout	bufferFrames	totalFrames
Readout_001	1	H	1	[647,561]	561	alternate	10	220
Readout_002	2	H	2	[647,561]	561	alternate	10	220
Readout_003	3	H	3	[647,561]	561	alternate	10	220
Readout_004	4	H	4	[647,561]	561	alternate	10	220
Readout_005	5	H	5	[647,561]	561	alternate	10	220
Readout_006	6	H	6	[647,561]	561	alternate	10	220
Readout_007	7	H	7	[647,561]	561	alternate	10	220
Readout_008	8	H	8	[647,561]	561	alternate	10	220
Readout_009	9	H	9	[647,561]	561	alternate	10	220
Readout_010	10	H	10	[647,561]	561	alternate	10	220
Readout_011	11	H	11	[647,561]	561	alternate	10	220
Readout_012	12	H	12	[647,561]	561	alternate	10	220
Readout_013	13	H	13	[647,561]	561	alternate	10	220
Readout_014	14	H	14	[647,561]	561	alternate	10	220
Readout_015	15	H	15	[647,561]	561	alternate	10	220
Readout_016	16	H	16	[647,561]	561	alternate	10	220
Readout_017	17	H	17	[647,561]	561	alternate	10	220
Readout_018	18	H	18	[647,561]	561	alternate	10	220
Readout_019	19	H	19	[647,561]	561	alternate	10	220
Readout_020	20	H	20	[647,561]	561	alternate	10	220
Readout_021	21	H	21	[647,561]	561	alternate	10	220
Readout_022	22	H	22	[647,561]	561	alternate	10	220
Readout_023	23	H	23	[647,561]	561	alternate	10	220
Readout_024	24	H	24	[647,561]	561	alternate	10	220
Readout_025	25	H	25	[647,561]	561	alternate	10	220
Readout_026	26	H	26	[647,561]	561	alternate	10	220
Readout_027	27	H	27	[647,561]	561	alternate	10	220
Readout_028	28	H	28	[647,561]	561	alternate	10	220
Readout_029	29	H	29	[647,561]	561	alternate	10	220
Readout_030	30	H	30	[647,561]	561	alternate	10	220
Readout_031	31	H	31	[647,561]	561	alternate	10	220
Readout_032	32	H	32	[647,561]	561	alternate	10	220
Readout_033	33	H	33	[647,561]	561	alternate	10	220
Readout_034	34	H	34	[647,561]	561	alternate	10	220
Readout_035	35	H	35	[647,561]	561	alternate	10	220
Readout_036	36	H	36	[647,561]	561	alternate	10	220
Readout_037	37	H	37	[647,561]	561	alternate	10	220
Readout_038	38	H	38	[647,561]	561	alternate	10	220
Readout_039	39	H	39	[647,561]	561	alternate	10	220
Readout_040	40	H	40	[647,561]	561	alternate	10	220
Readout_041	41	H	41	[647,561]	561	alternate	10	220
Readout_042	42	H	42	[647,561]	561	alternate	10	220
Readout_043	43	H	43	[647,561]	561	alternate	10	220
Readout_044	44	H	44	[647,561]	561	alternate	10	220
Readout_045	45	H	45	[647,561]	561	alternate	10	220
Readout_046	46	H	46	[647,561]	561	alternate	10	220
Readout_047	47	H	47	[647,561]	561	alternate	10	220
Readout_048	48	H	48	[647,561]	561	alternate	10	220
Readout_049	49	H	49	[647,561]	561	alternate	10	220
Readout_050	50	H	50	[647,561]	561	alternate	10	220
Readout_051	51	H	51	[647,561]	561	alternate	10	220
Readout_052	52	H	52	[647,561]	561	alternate	10	220
Repeat_Readout_010	10	R	53	[647,561]	561	alternate	10	220
Repeat_Readout_020	20	R	54	[647,561]	561	alternate	10	220
Repeat_Readout_030	30	R	55	[647,561]	561	alternate	10	220
Repeat_Readout_040	40	R	56	[647,561]	561	alternate	10	220
Repeat_Readout_050	50	R	57	[647,561]	561	alternate	10	220
